# Supplementary material for: Experiences of a Digital Mental Health Intervention from the Perspectives of Young People Recovering from First-Episode Psychosis: A Focus Group Study
Source: MDPI journal article supplement (doi:10.3390/ijerph20095745), 2023-05-08
Supplement: s1 [file s1]

**Table S1.** HoryzonsCa pilot study—focus group coding framework.

| Codes                                 | Sub-Codes                                                                                 |
|---------------------------------------|-------------------------------------------------------------------------------------------|
| 1.General                             | 1.1 General comments (e.g., likes and dislikes—related to Horyzons)                       |
|                                       | 1.1.1 Expectations (in joining Horyzons)                                                  |
|                                       | 1.1.1.1 To connect with others with similar experiences                                   |
|                                       | 1.1.1.2. To improve myself / life                                                         |
|                                       | 1.1.1.3 Out of curiosity—not otherwise specified                                          |
|                                       | 1.1.1.4. Other                                                                            |
|                                       | 1.1.2. Impact of Horyzons on your daily life                                              |
|                                       | 1.1.3. Comments related to the future direction of Horyzons                               |
|                                       | 1.2. General questions (related to Horyzons)                                              |
|                                       | 1.3 General comments and questions (unrelated to Horyzons)                                |
| 2. Usefulness<br>of platform features | 1.4 General comments and questions (related to Horyzons research)                         |
|                                       | 1.5 General neutral or unclear                                                            |
|                                       | 2.1. Elements considered to be useful/helpful                                             |
|                                       | 2.1.1. What it was helpful for                                                            |
|                                       | 2.1.1.1 Coping and recovery (e.g., anxiety, work, stress, and self-improvement/knowledge) |
|                                       | 2.1.1.2. Feeling validated and understood                                                 |
|                                       | 2.1.1.3. Skills acquisition                                                               |
|                                       | 2.1.1.4. Finding employment                                                               |
|                                       | 2.1.1.5. Other                                                                            |
|                                       | 2.1.2. Individually tailored experience                                                   |
|                                       | 2.1.3. Community/peer network (ability to exchange re: hobbies, illness)                  |
|                                       | 2.1.4. Content                                                                            |
|                                       | 2.1.5. Moderation                                                                         |
|                                       | 2.1.5.1. Peer Moderation                                                                  |
|                                       | 2.1.5.2. Clinical Moderation                                                              |
|                                       | 2.1.6. Other platform features                                                            |
|                                       | 2.2. Elements of concern and suggestions (not useful or missing)                          |
|                                       | 2.2.1. Language concerns (i.e., French / English / bilingualism)                          |
|                                       | 2.2.1.1. Suggestions (would improve)                                                      |
|                                       | 2.2.2. Individually tailored experience concerns                                          |
|                                       | 2.2.2.1. Suggestions (would improve)                                                      |
|                                       | 2.2.3. Community/peer network concerns                                                    |
|                                       | 2.2.3.1. Suggestions (would improve)                                                      |
|                                       | 2.2.4. Content concerns                                                                   |
|                                       | 2.2.4.1. Suggestions (would improve)                                                      |
|                                       | 2.2.5. Clinical moderation concerns                                                       |
|                                       | 2.2.5.1. Moderation suggestions (would improve)                                           |
|                                       | 2.2.5.2.1. Peer moderator concerns                                                        |
|                                       | 2.2.5.2.1. Peer moderator suggestions (would improve)                                     |
|                                       | 2.2.5.3. Clinical moderator concerns                                                      |
|                                       | 2.2.5.3.1. Clinical moderator suggestions (would improve)                                 |
|                                       | 2.2.6. Other platform feature concerns                                                    |
|                                       | 2.2.6.1 Other platform suggestions (would improve)                                        |
|                                       | 2.3 Elements related to usefulness neutral—unclear                                        |
|                                       | 2.3.1. Individually tailored experience unclear                                           |
|                                       | 2.3.2. Community/peer network unclear                                                     |
|                                       | 2.3.3. Content unclear                                                                    |
|                                       | 2.3.4. Clinical Moderation unclear                                                        |

Table S1. *Cont.*

| Codes                    | Sub-Codes                                                                                                                                                                                                                                                                                                                                                                                                          |
|--------------------------|--------------------------------------------------------------------------------------------------------------------------------------------------------------------------------------------------------------------------------------------------------------------------------------------------------------------------------------------------------------------------------------------------------------------|
|                          | 2.3.4.1. Peer moderation unclear<br>2.3.4.2. Clinical moderator unclear<br>2.3.5. Other platform features unclear<br>2.4. Elements of the platform that have improved based on previous focus group feedback                                                                                                                                                                                                       |
| 3. Safety                | 3.1. Elements of the platform that enhance safety/support<br>3.2. Elements of concern regarding safety/support (not useful/missing)<br>3.2.1 Suggestions (would make it safer)<br>3.3. Safety/support questions<br>3.4. Safety/support neutral-unclear                                                                                                                                                             |
| 4. Technical             | 4.1. Navigation<br>4.1.1 Likes<br>4.1.2 Dislikes or challenges<br>4.1.2.1. Suggestions (would improve)<br>4.2. Visual design<br>4.2.1 Likes<br>4.2.2 Dislikes<br>4.2.2.1. Suggestions (would improve)<br>4.3. Accessibility<br>4.3.1. Technical bugs<br>4.3.2. Device-related access<br>4.3.3. Other access-related comments<br>4.3.4. Accessibility suggestions (would improve)<br>4.4. Technical neutral-unclear |
| 5. Participation         | 5.1. Actual use<br>5.1.1 Self<br>5.1.2 Others<br>5.2. Engagement (motivation)<br>5.2.1 Increases (self, others)<br>5.2.2 Limit/missing/would increase (self, others)<br>5.3. Willingness/desire to use Horyzons long term<br>5.4. Participation neutral-unclear                                                                                                                                                    |
| 6. Orientation           | 6.1. Elements of orientation considered helpful<br>6.2. Orientation concerns (not useful/missing)<br>6.2.1 Suggestions (would improve)<br>6.3. Elements of the website that participants were unaware of<br>6.4. Orientation neutral-unclear                                                                                                                                                                       |
| 7. Meet-Up               | 7.1. Elements of the meet-up considered helpful<br>7.2. Meet-up concerns (not useful/missing)<br>7.2.1 Suggestions (would improve)<br>7.3 Meet-up neutral-unclear                                                                                                                                                                                                                                                  |
| 8. Facilitator Summaries | 8.1. Facilitator summaries of participant comments                                                                                                                                                                                                                                                                                                                                                                 |
